# Supplementary material
Source: PubMed Central journal article supplement (PMC1459373)

# $^{40}\text{Ar}/^{39}\text{Ar}$ Laser Incremental-Heating Spectrum on Plagioclase

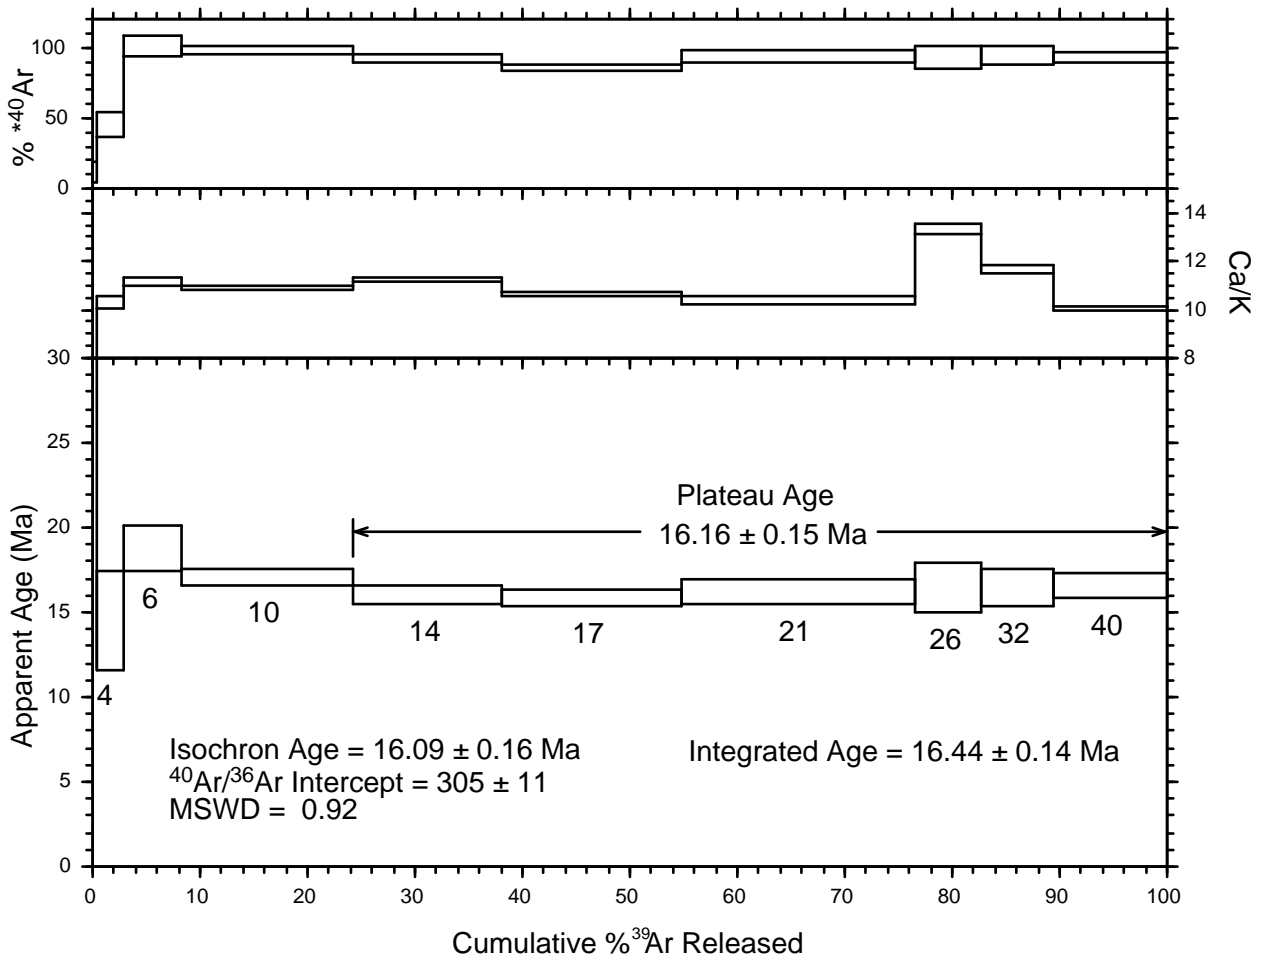

Supplement: pnas_0506126103_1.pdf [file pnas_0506126103_1.pdf]

Plot of average body weight and cranial capacity in anthrpid primates

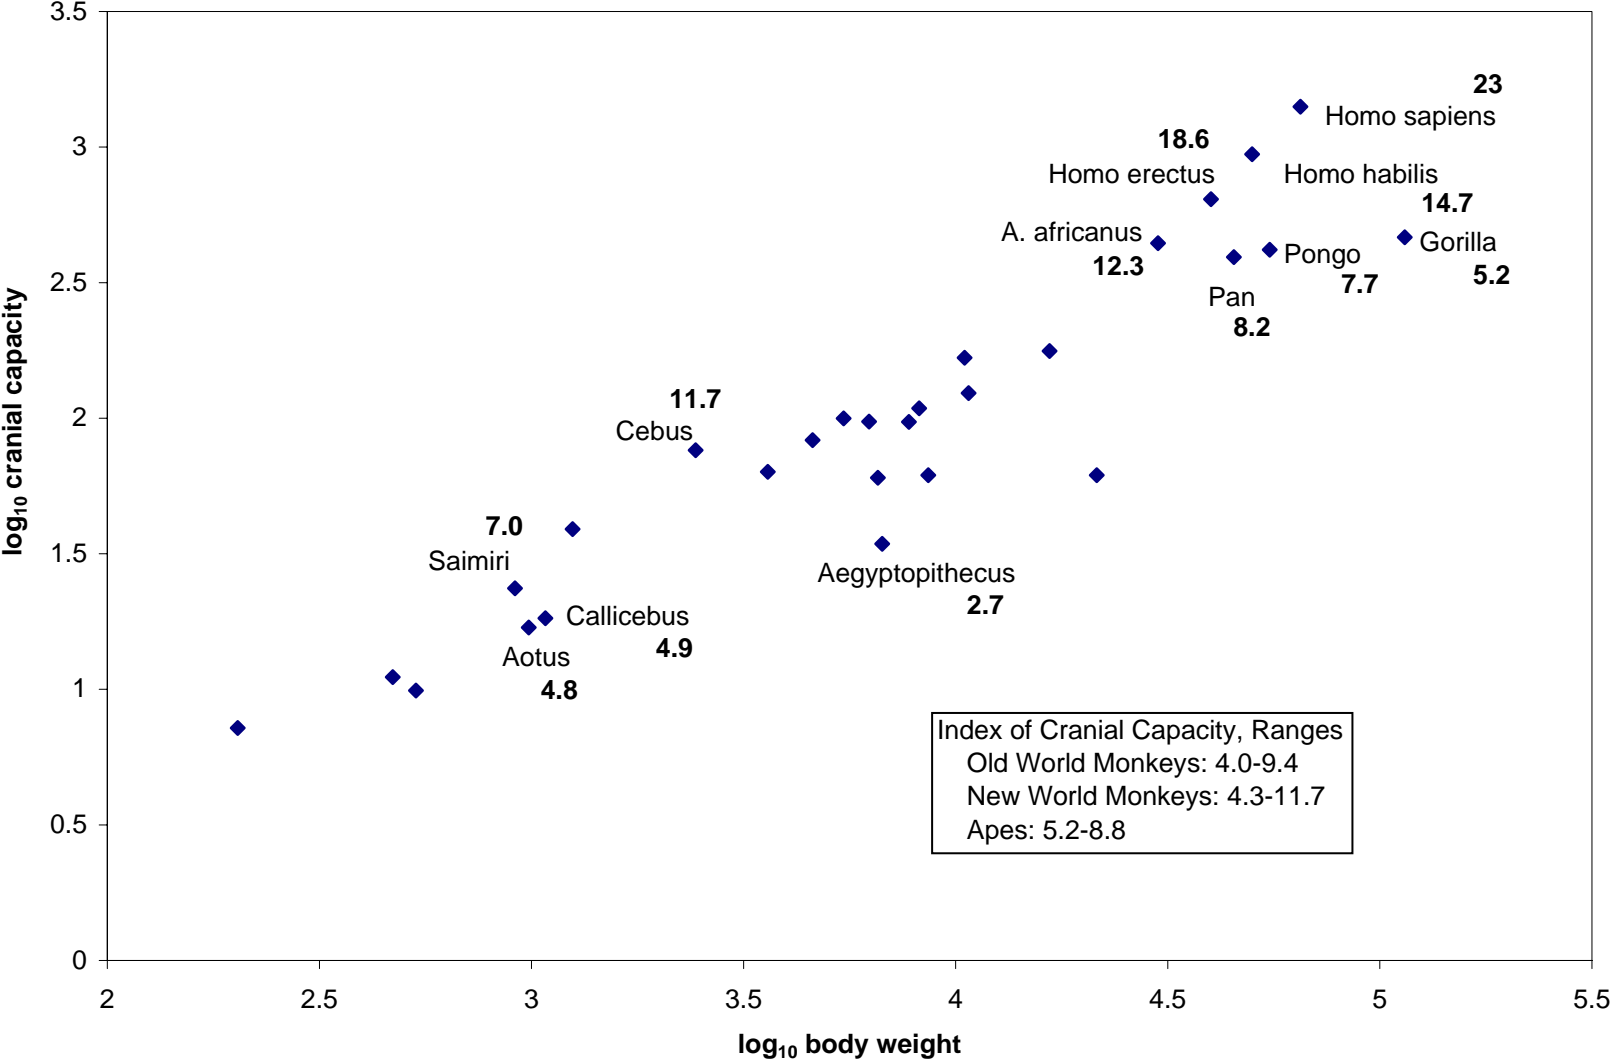

Supplement: pnas_0506126103_2.pdf [file pnas_0506126103_2.pdf]
